# Supplementary material for: A Short-Cut Data Mining Method for the Mass Spectrometric Characterization of Block Copolymers
Source: MDPI journal article supplement (doi:10.3390/pr10010042), 2021-12-27
Supplement: s1 [file s1]

# A Short-Cut Data Mining Method for the Mass Spectrometric Characterization of Block Copolymers

Ákos Kuki<sup>1</sup>, Gergő Róth<sup>1,2</sup>, Anna Nagy<sup>1</sup>, Miklós Zsuga<sup>1</sup>, Sándor Kéki<sup>1</sup>, Tibor Nagy<sup>1\*</sup>

<sup>1</sup>Department of Applied Chemistry, Faculty of Science and Technology, University of Debrecen, Egyetem tér 1, H-4032 Debrecen, Hungary

<sup>2</sup>Doctoral School of Chemistry, University of Debrecen, Egyetem tér 1, H-4032 Debrecen, Hungary

## Table of content

|                                                                                                                                   |   |
|-----------------------------------------------------------------------------------------------------------------------------------|---|
| Fig. S1. MALDI-TOF mass spectrum of sample RPE-1720-1.....                                                                        | 2 |
| Fig. S2. MALDI-TOF mass spectrum of sample PE-6100-1.....                                                                         | 2 |
| Fig. S3. MALDI-TOF mass spectrum of sample PE-6100-2.....                                                                         | 3 |
| Fig. S4. MALDI-TOF mass spectrum of sample RPE-1720-2.....                                                                        | 3 |
| Fig. S5. MALDI-TOF mass spectrum of sample PE-6200 .....                                                                          | 4 |
| Fig. S6. MALDI-TOF mass spectrum of sample RPE-1740 .....                                                                         | 4 |
| Fig. S7. MALDI-TOF mass spectrum of sample RPE-3110.....                                                                          | 5 |
| Table S1. The constants of the polynomials originated from the intensities of isotopic peaks as a function of C atom number. .... | 5 |
| Table S2. The constants of polynomials originated from the intensities of isotopic peaks as a function of O atom number. ....     | 6 |

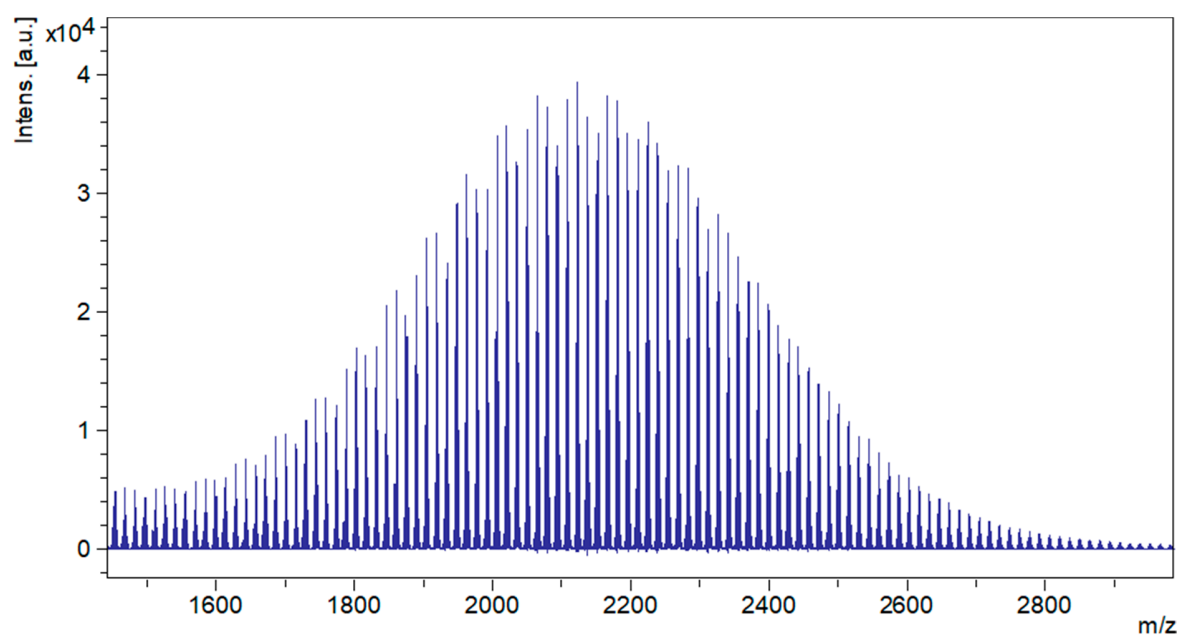

*Fig. S1. MALDI-TOF mass spectrum of sample RPE-1720-1*

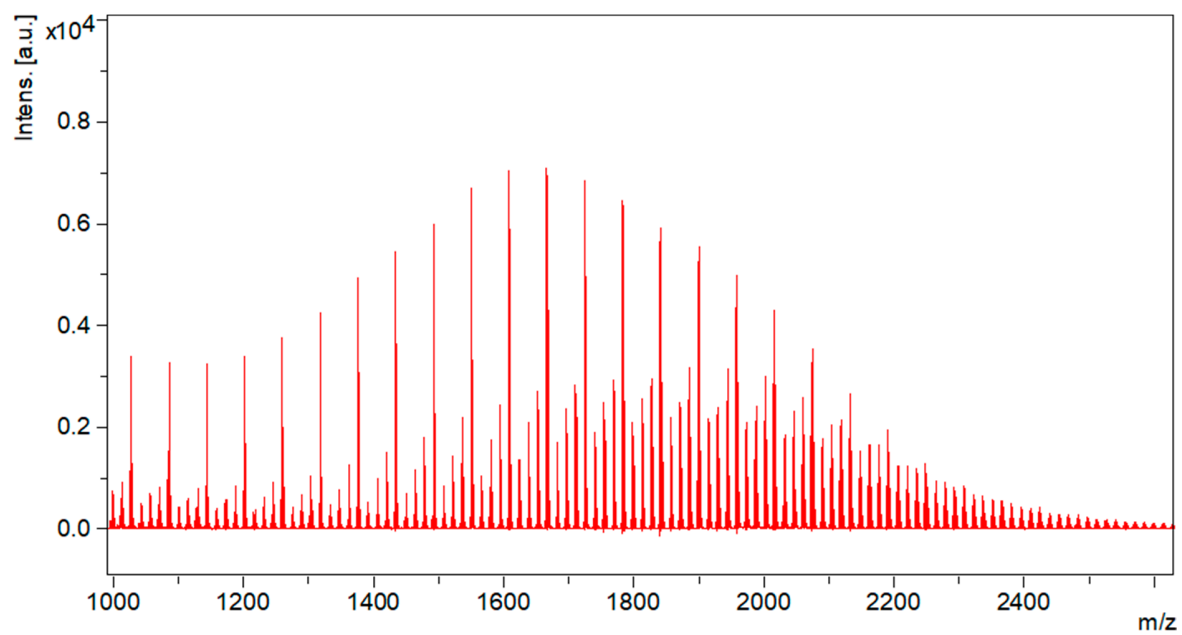

*Fig. S2. MALDI-TOF mass spectrum of sample PE-6100-1*

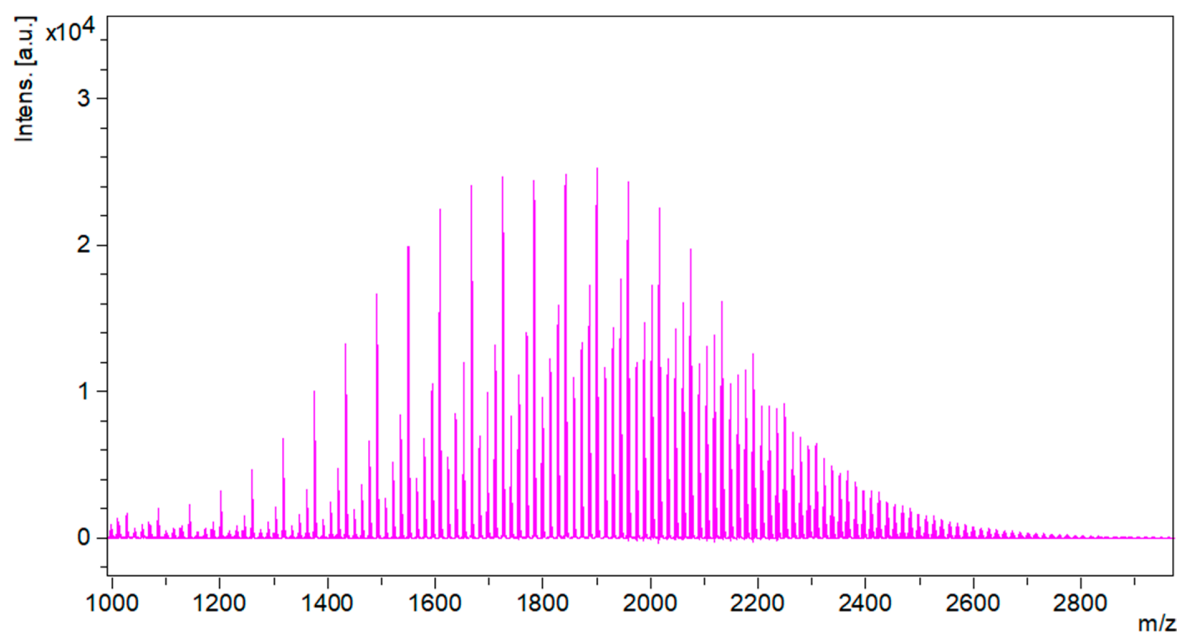

*Fig. S3. MALDI-TOF mass spectrum of sample PE-6100-2*

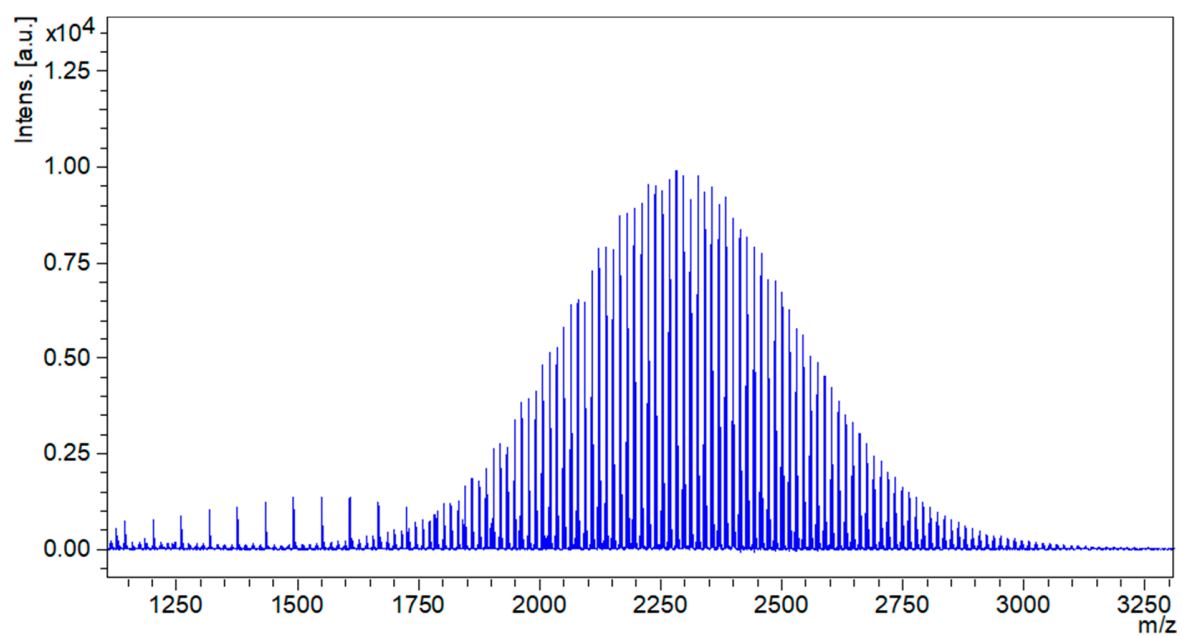

*Fig. S4. MALDI-TOF mass spectrum of sample RPE-1720-2*

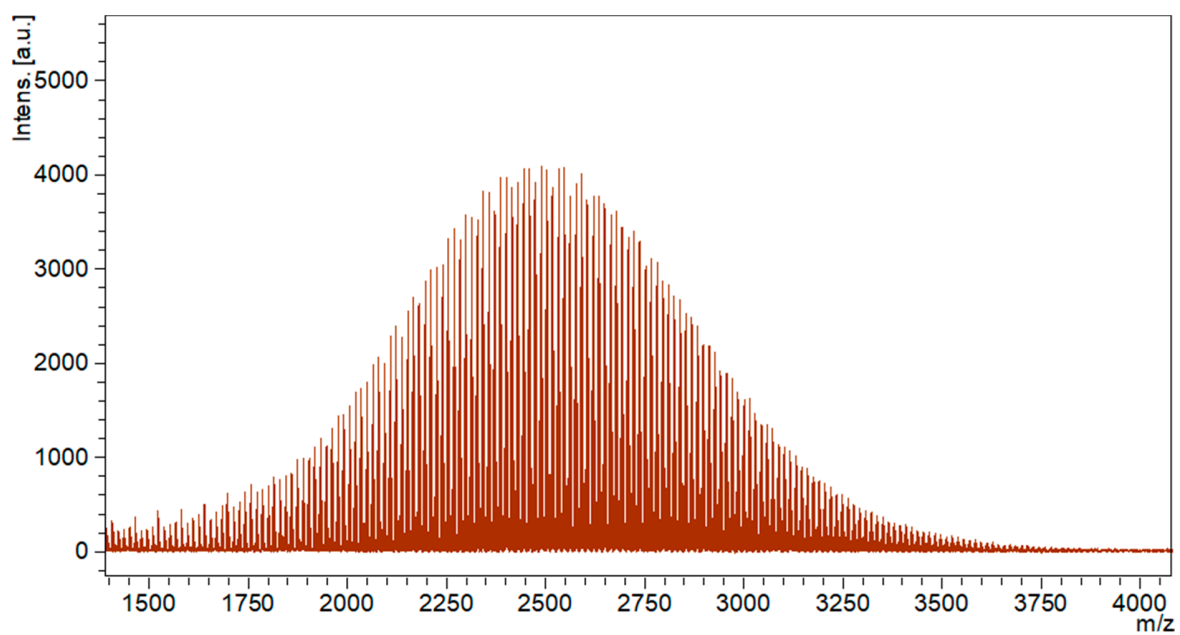

*Fig. S5. MALDI-TOF mass spectrum of sample PE-6200*

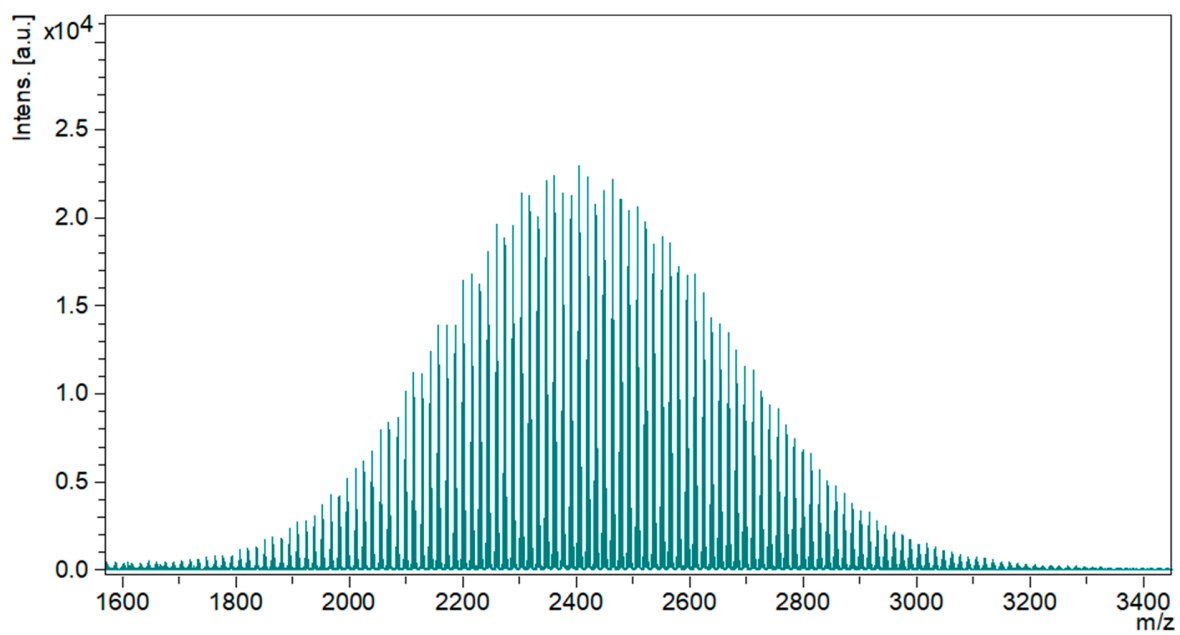

*Fig. S6. MALDI-TOF mass spectrum of sample RPE-1740*

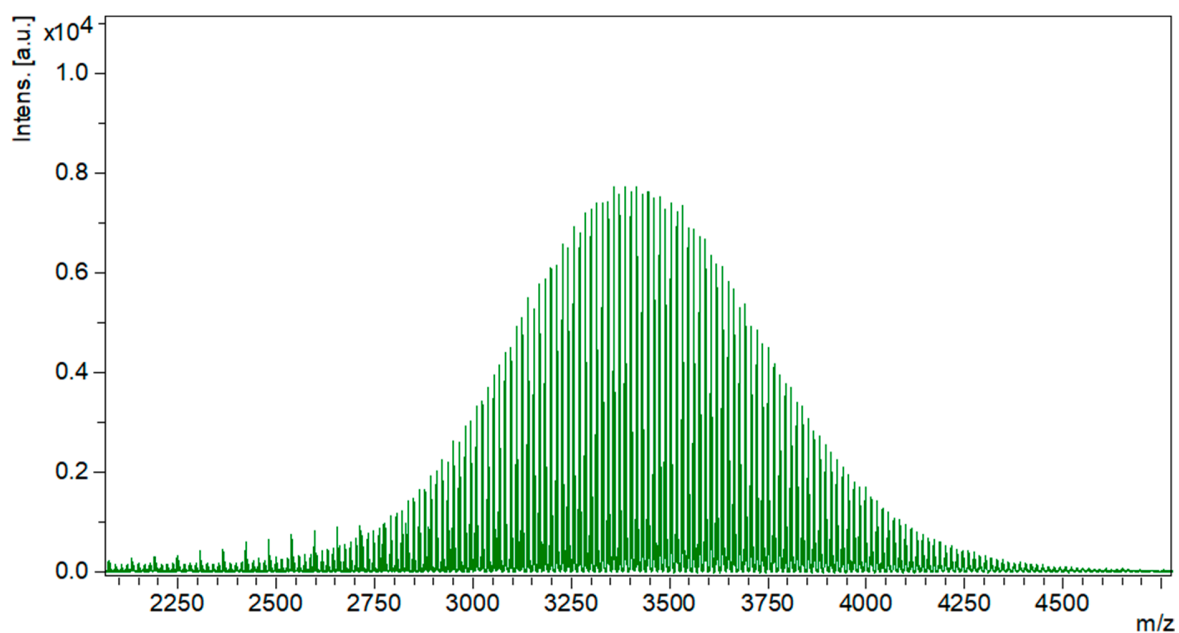

Fig. S7. MALDI-TOF mass spectrum of sample RPE-3110

Table S1. The constants of the polynomials originated from the intensities of isotopic peaks as a function of C atom number.

|                                          | a         | b         | c         | d         | e         | R <sup>2</sup> |
|------------------------------------------|-----------|-----------|-----------|-----------|-----------|----------------|
| <b>m/z</b><br><b>(monoisotopic peak)</b> | 8.17E-11  | -9.56E-08 | 4.42E-05  | -1.00E-02 | 9.89E-01  | 1.000          |
| <b>m/z+1</b>                             | -1.85E-10 | 1.88E-07  | -6.61E-05 | 8.26E-03  | 3.72E-02  | 0.997          |
| <b>m/z+2</b>                             | 6.02E-11  | -3.44E-08 | -1.68E-06 | 2.79E-03  | -3.93E-02 | 0.996          |
| <b>m/z+3</b>                             | 7.30E-11  | -6.85E-08 | 1.83E-05  | -5.60E-04 | 4.93E-03  | 1.000          |
| <b>m/z+4</b>                             | 5.78E-12  | -1.66E-08 | 8.25E-06  | -5.65E-04 | 9.10E-03  | 1.000          |
| <b>m/z+5</b>                             | -2.10E-11 | 1.15E-08  | -8.47E-08 | -6.47E-05 | 1.67E-03  | 1.000          |
| <b>m/z+6</b>                             | -1.51E-11 | 1.19E-08  | -1.87E-06 | 1.02E-04  | -1.47E-03 | 1.000          |
| <b>m/z+7</b>                             | -4.39E-12 | 5.14E-09  | -1.07E-06 | 7.19E-05  | -1.21E-03 | 1.000          |
| <b>m/z+8</b>                             | 8.87E-13  | 7.83E-10  | -2.59E-07 | 2.14E-05  | -4.01E-04 | 1.000          |
| <b>m/z+9</b>                             | 1.85E-12  | -5.86E-10 | 5.80E-08  | -1.70E-06 | 5.67E-06  | 1.000          |
| <b>m/z+10</b>                            | 1.29E-12  | -6.05E-10 | 9.76E-08  | -5.84E-06 | 9.16E-05  | 1.000          |
| <b>m/z+11</b>                            | 6.46E-13  | -3.44E-10 | 6.14E-08  | -4.00E-06 | 6.67E-05  | 0.999          |
| <b>m/z+12</b>                            | 2.66E-13  | -1.51E-10 | 2.83E-08  | -1.91E-06 | 3.28E-05  | 0.998          |

Table S2. The constants of polynomials originated from the intensities of isotopic peaks as a function of O atom number.

|               | <b>a</b>  | <b>b</b>  | <b>c</b>  | <b>d</b>  | <b>e</b>  | <b>R<sup>2</sup></b> |
|---------------|-----------|-----------|-----------|-----------|-----------|----------------------|
| <b>m/z</b>    | 6.63E-13  | -1.43E-09 | 2.10E-06  | -2.05E-03 | 1.00E+00  | 1.000                |
| <b>m/z+2</b>  | -2.59E-12 | 4.27E-09  | -4.20E-06 | 2.05E-03  | 1.61E-07  | 1.000                |
| <b>m/z+4</b>  | 3.73E-12  | -4.25E-09 | 2.10E-06  | -2.05E-06 | -3.14E-07 | 1.000                |
| <b>m/z+6</b>  | -2.28E-12 | 1.39E-09  | -1.89E-09 | -4.26E-08 | 3.01E-07  | 1.000                |
| <b>m/z+8</b>  | 4.27E-13  | 2.30E-11  | -1.12E-09 | 2.09E-08  | -1.38E-07 | 1.000                |
| <b>m/z+10</b> | 5.15E-14  | -4.39E-12 | 1.73E-10  | -3.16E-09 | 2.05E-08  | 1.000                |
